# Supplementary material for: Total Synthesis of Eliglustat via Diastereoselective Amination of Chiral para-Methoxycinnamyl Benzyl Ether
Source: MDPI journal article supplement (doi:10.3390/molecules27082603), 2022-04-18
Supplement: s1 [file s1]

Article

# Total Synthesis of Eliglustat via Diastereoselective Amination of Chiral *para*-Methoxycinnamyl Benzyl Ether

Younggyu Kong, Pulla Reddy Boggu, Gi Min Park, Yeon Su Kim, Seong Hwan An, In Su Kim and Young Hoon Jung \*

School of Pharmacy, Sungkyunkwan University, Suwon 16419, Korea

\* Correspondence: yhjung@skku.edu; Tel.: +82-31-290-7711; fax: +82-31-292-8800

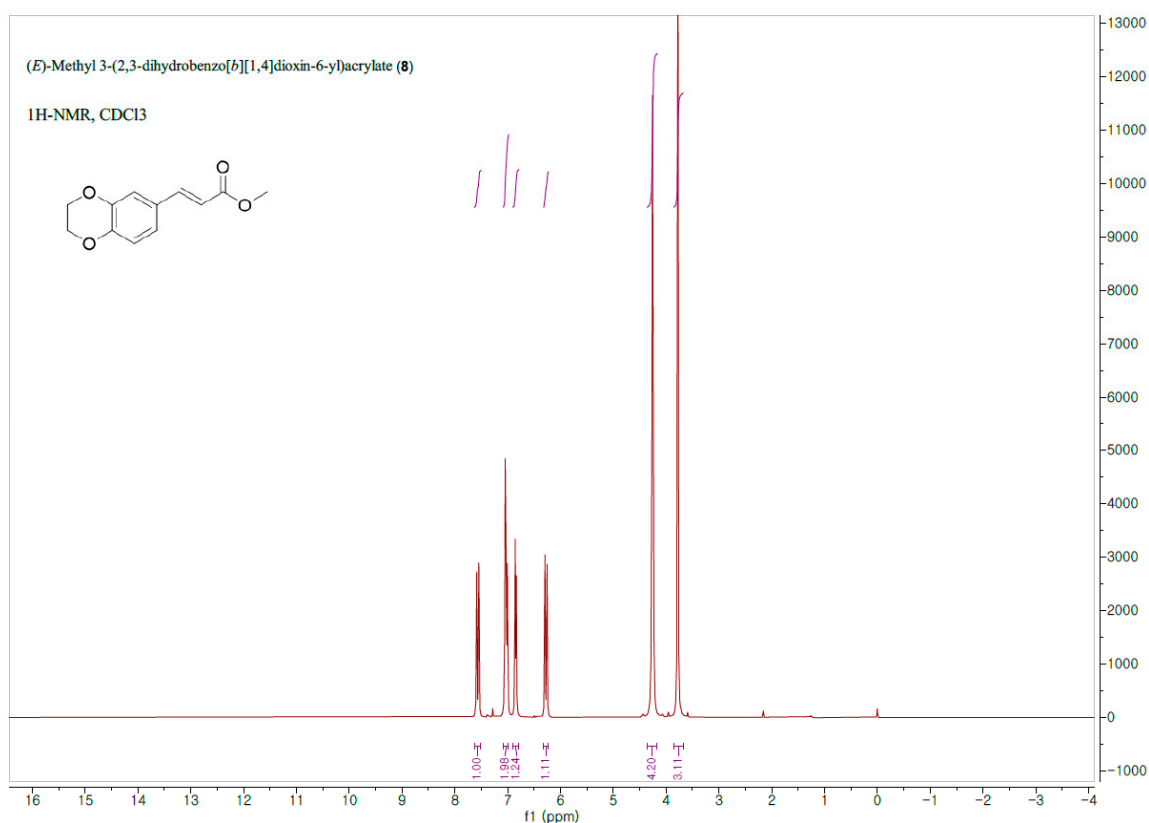

Figure S1. H and <sup>13</sup>C NMR Spectra-S2-S11.

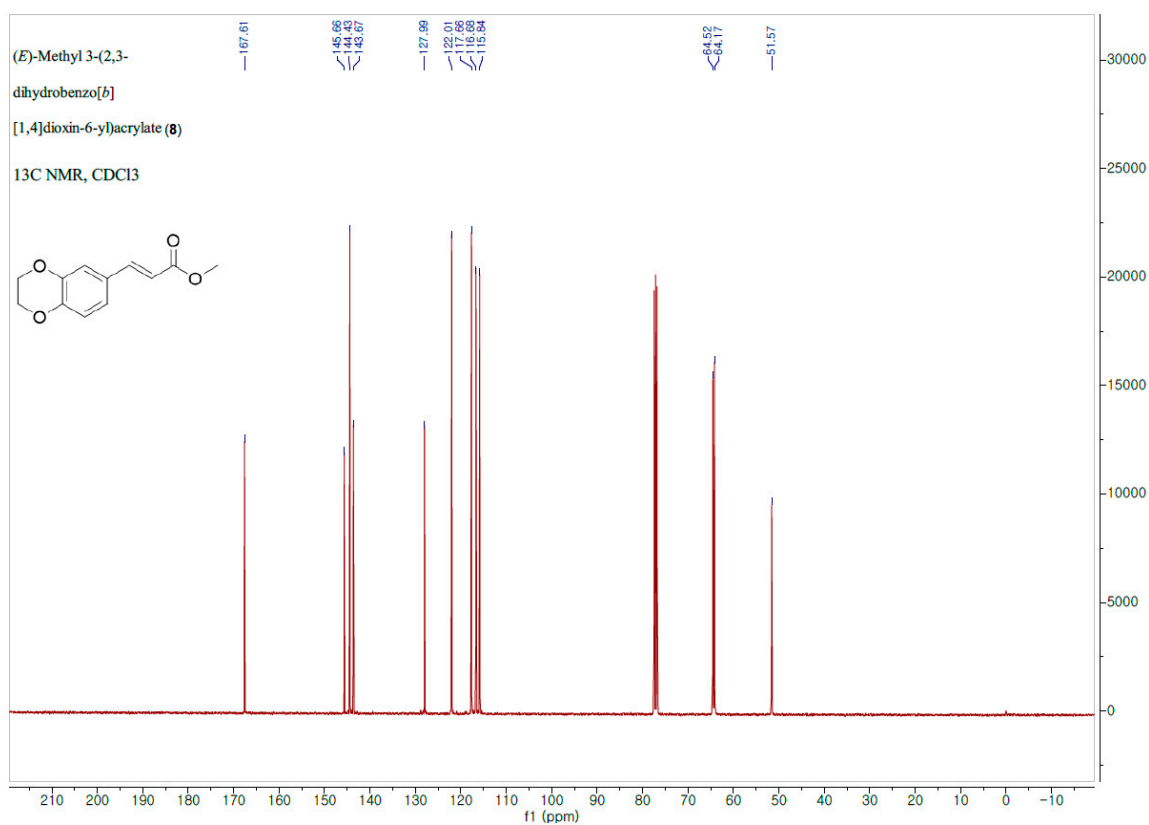

**Figure S2.** H and <sup>13</sup>C NMR Spectra-S2-S11.

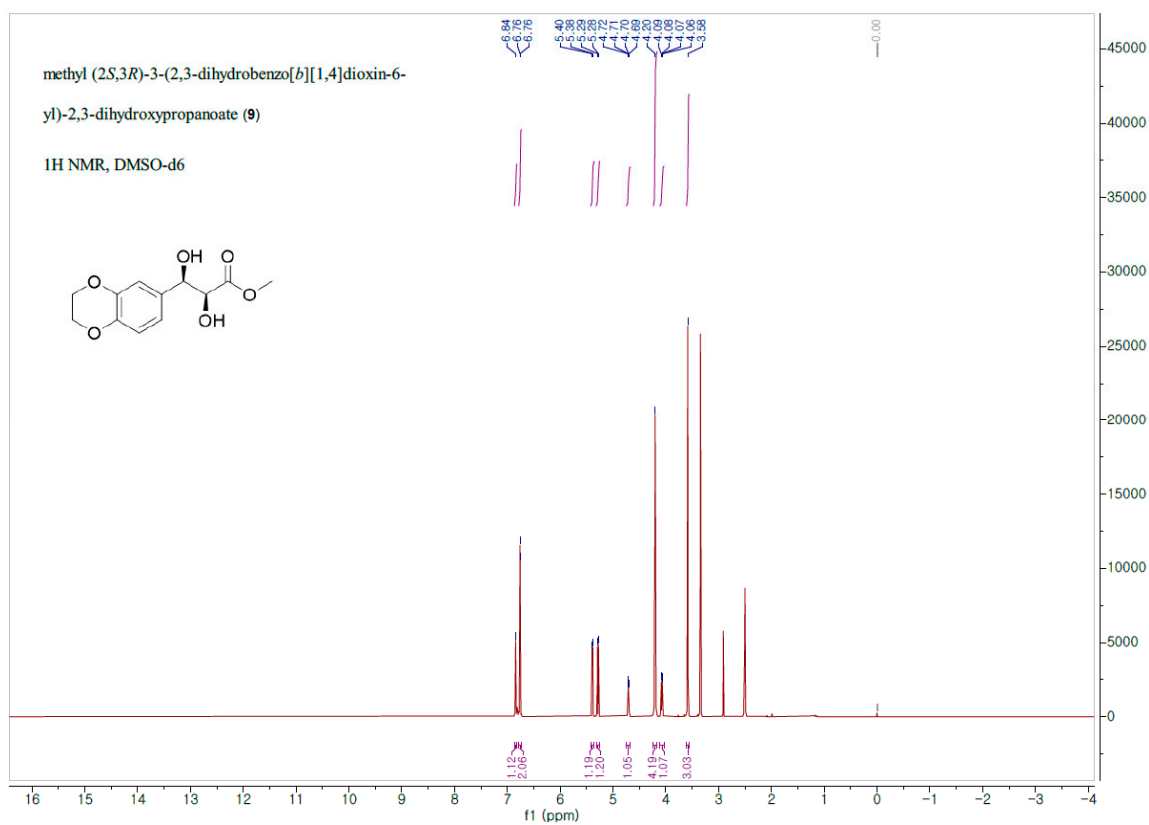

**Figure S3.** H and <sup>13</sup>C NMR Spectra-S2-S11.

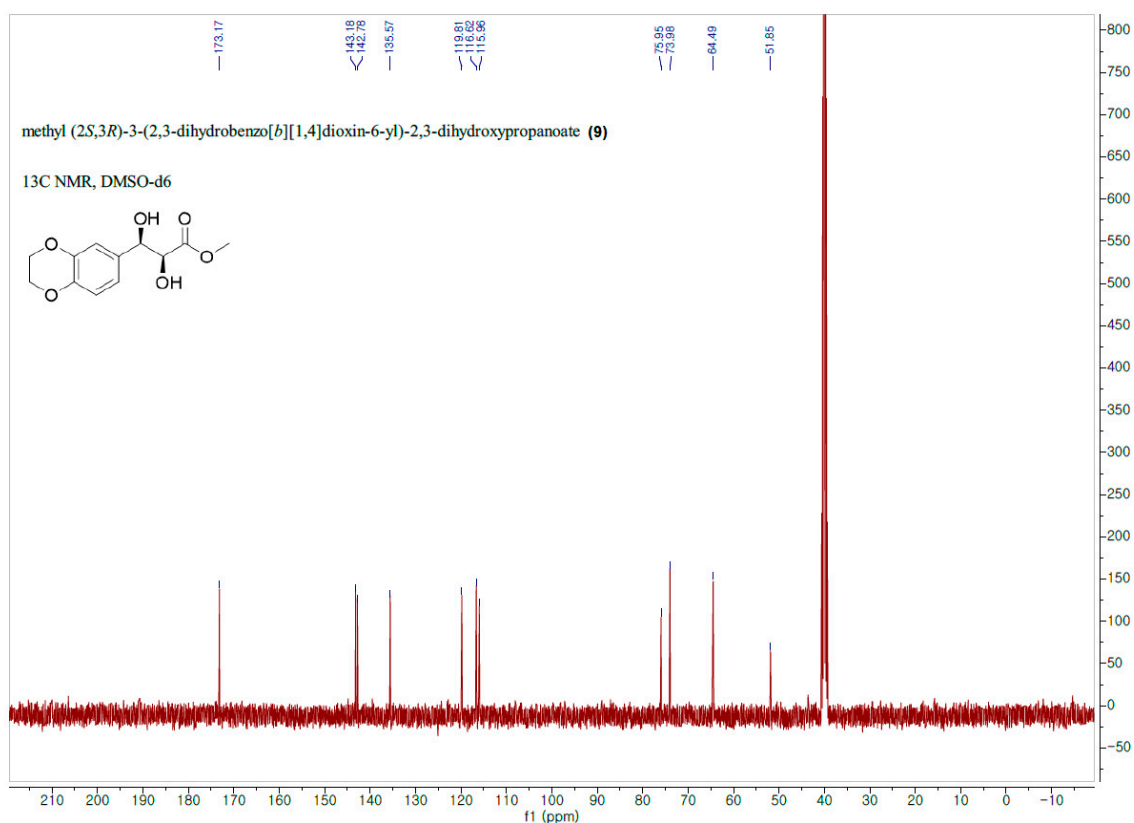

Figure S4. H and 13C NMR Spectra-S2-S11.

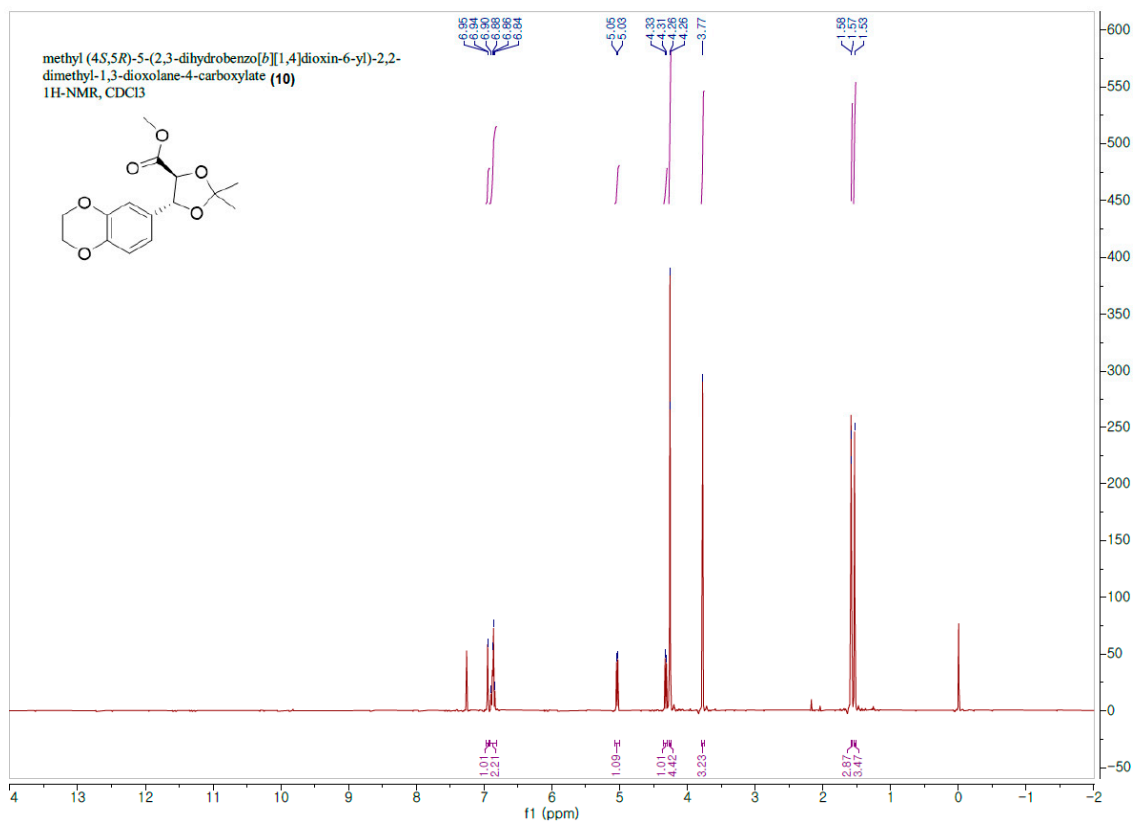

Figure S5. H and 13C NMR Spectra-S2-S11.

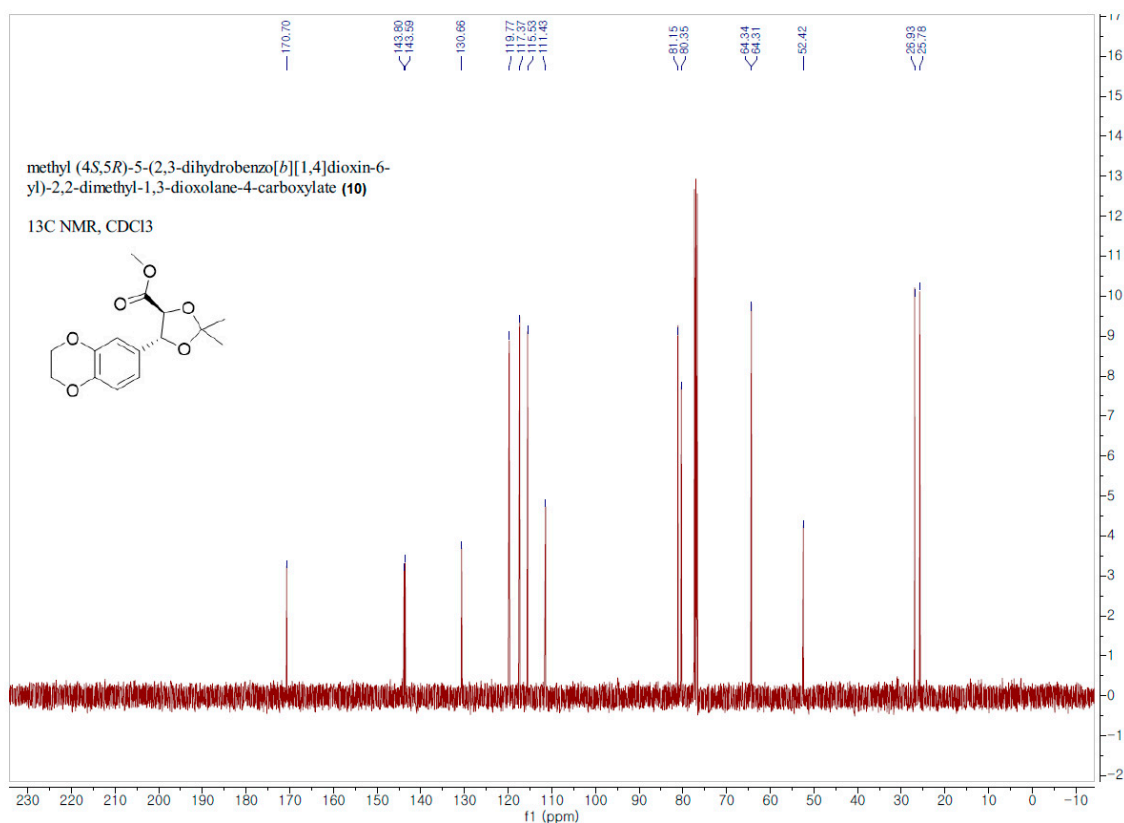Figure S6. H and <sup>13</sup>C NMR Spectra-S2-S11.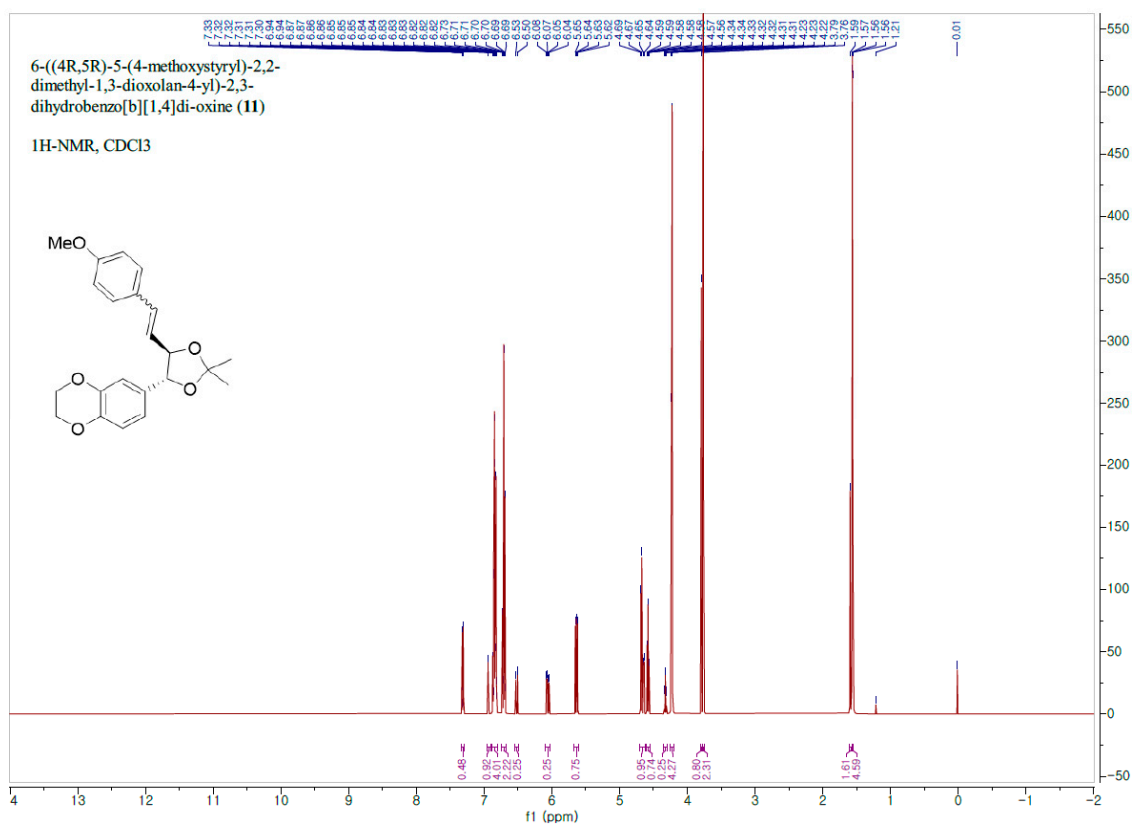Figure S7. H and <sup>13</sup>C NMR Spectra-S2-S11.

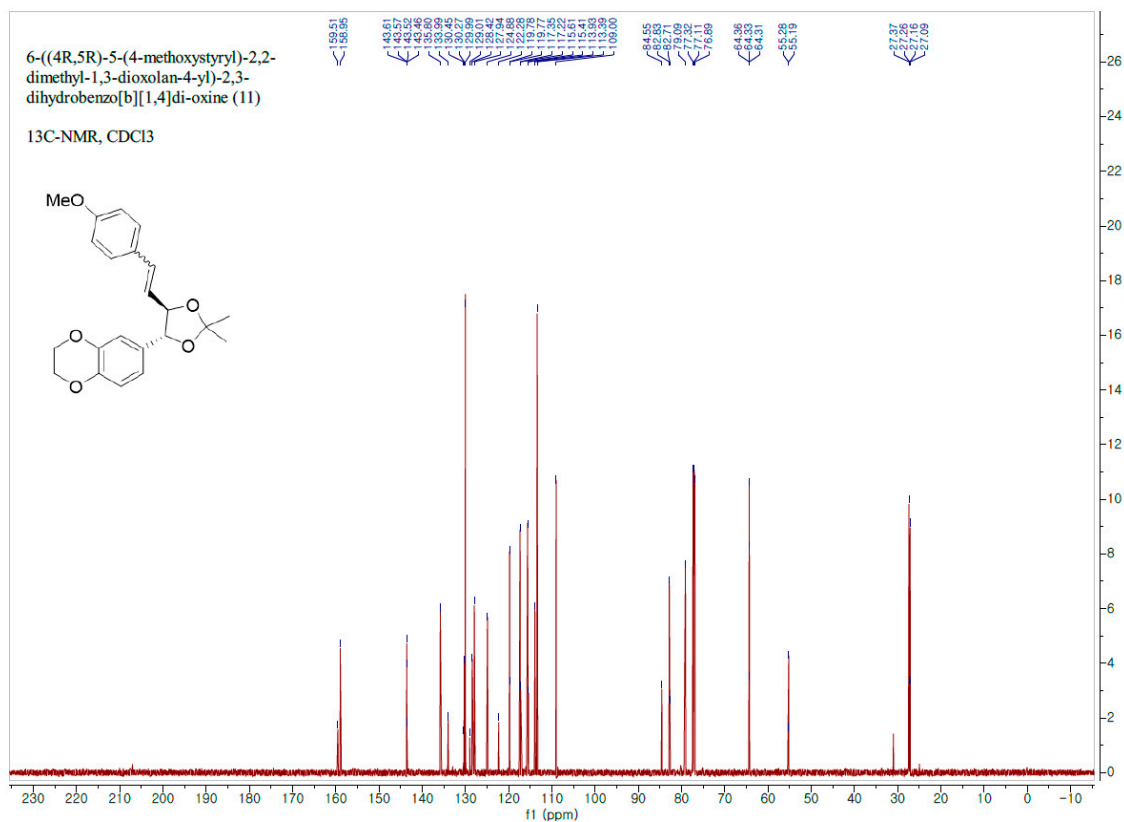Figure S8. H and <sup>13</sup>C NMR Spectra-S2-S11.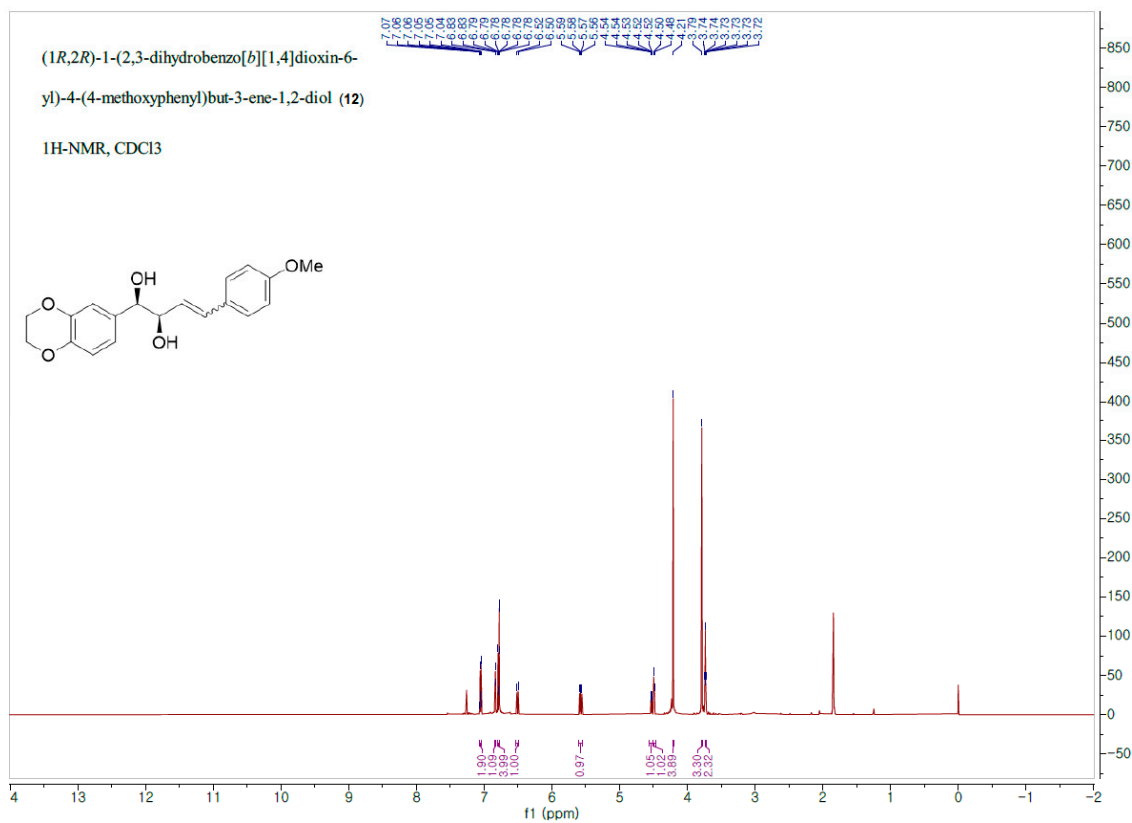

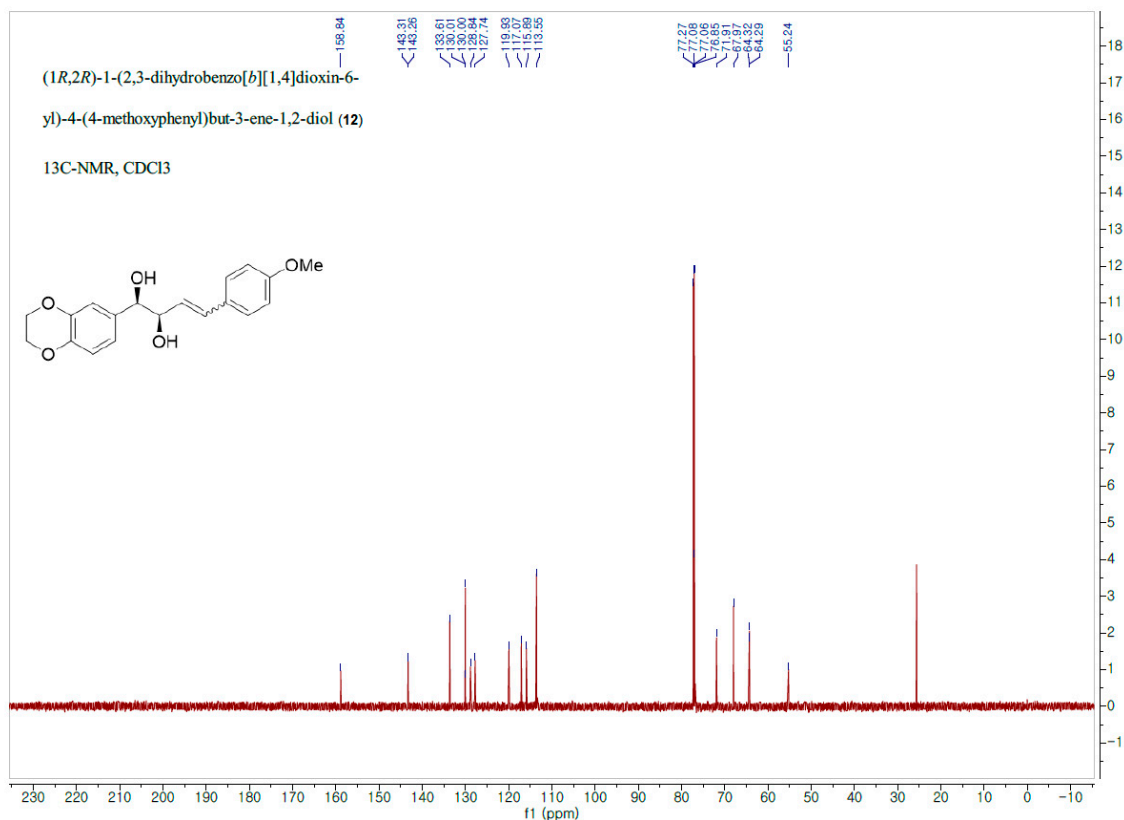Figure S10. H and <sup>13</sup>C NMR Spectra-S2-S11.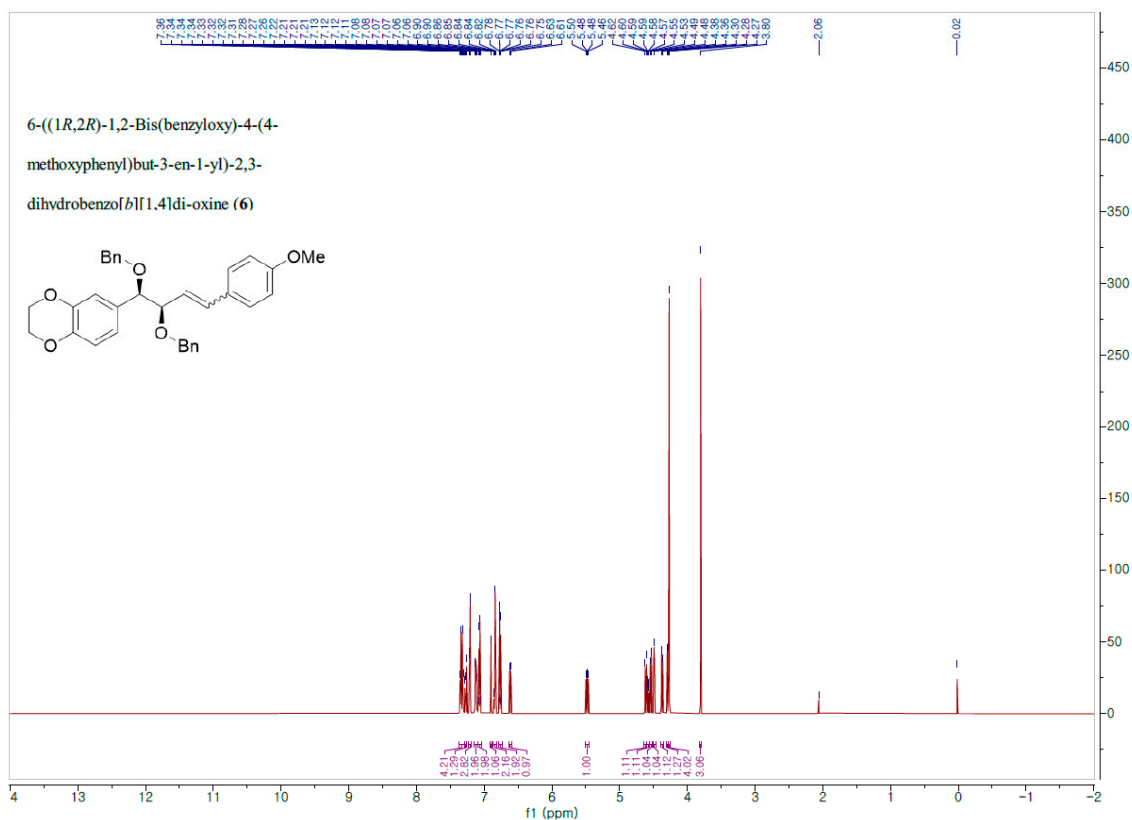Figure S11. H and <sup>13</sup>C NMR Spectra-S2-S11.

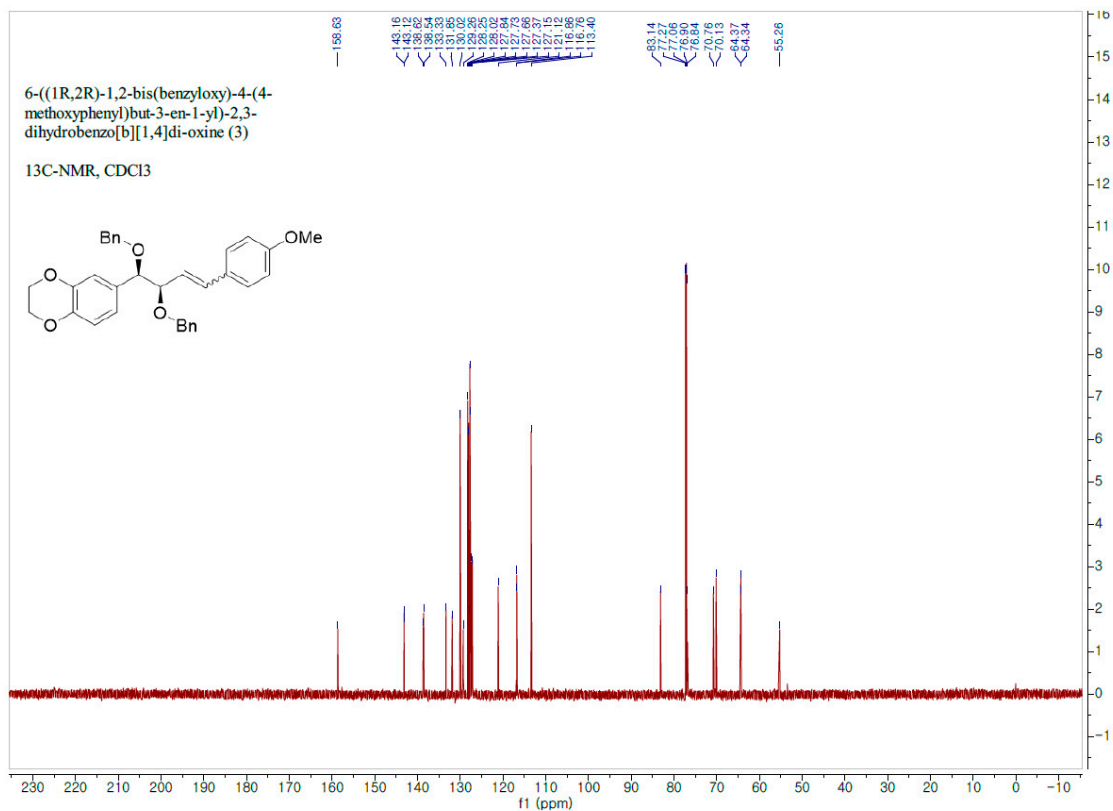Figure S12. H and <sup>13</sup>C NMR Spectra-S2-S11.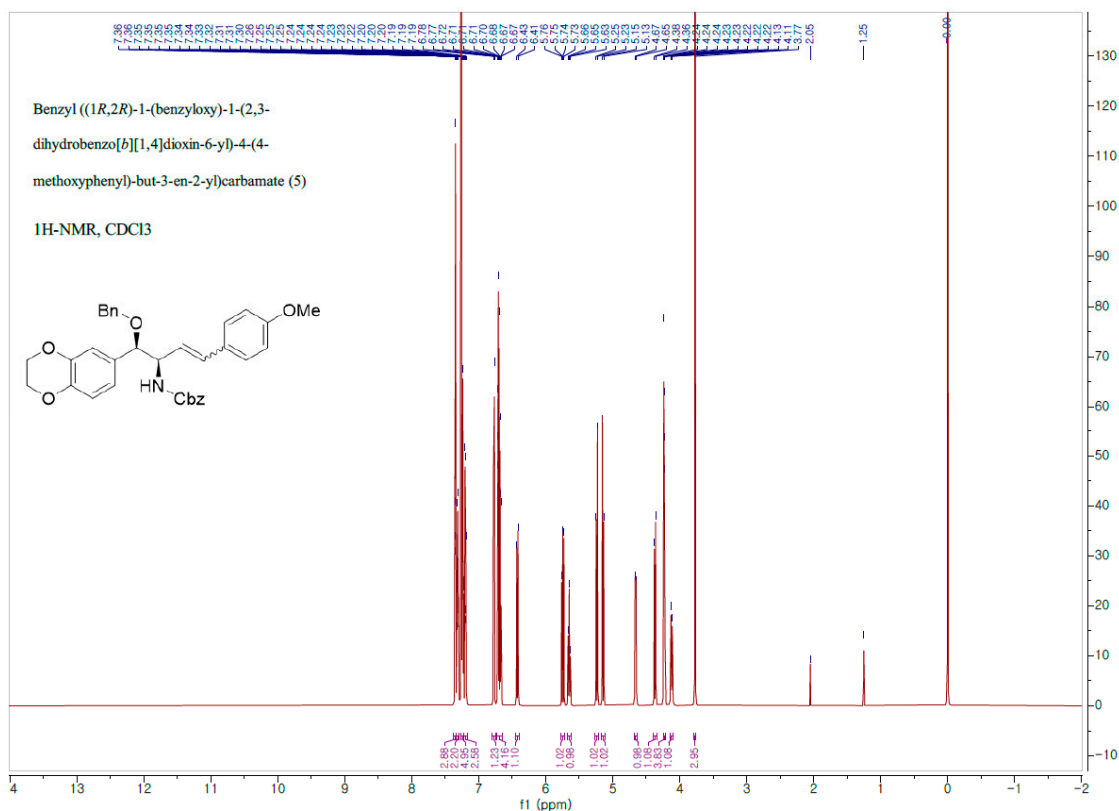

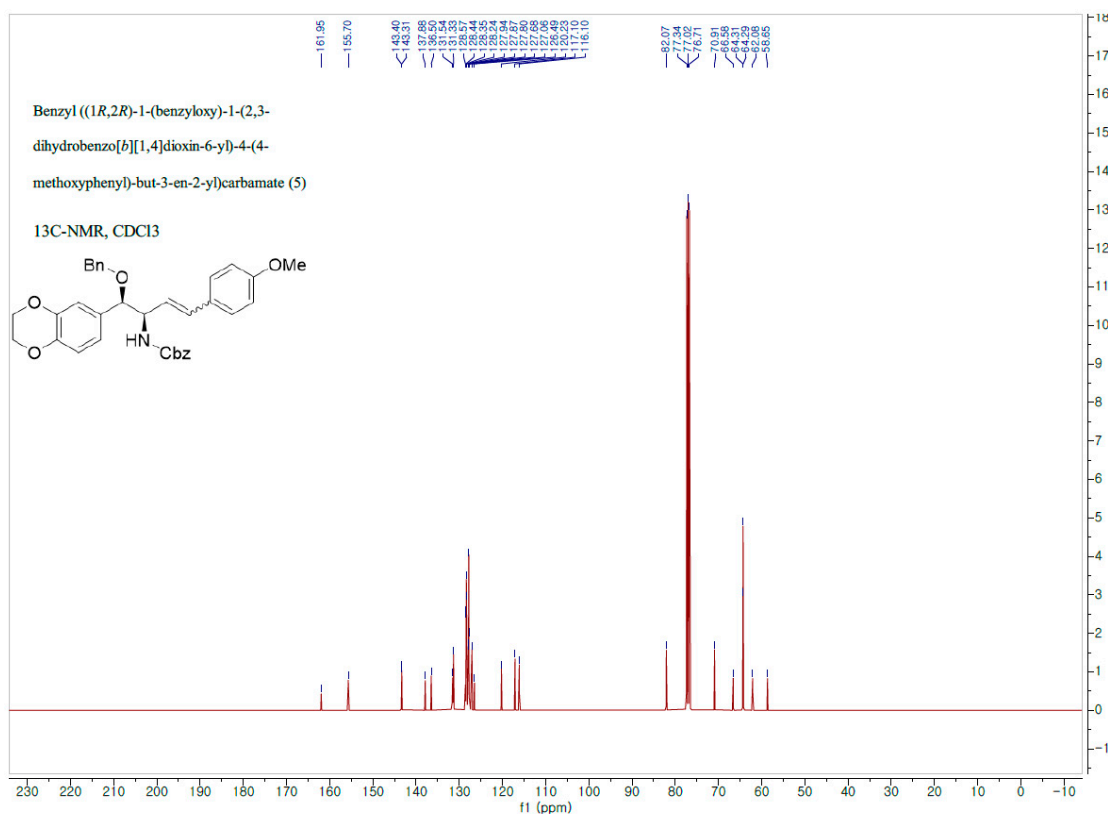Figure S14. H and <sup>13</sup>C NMR Spectra-S2-S11.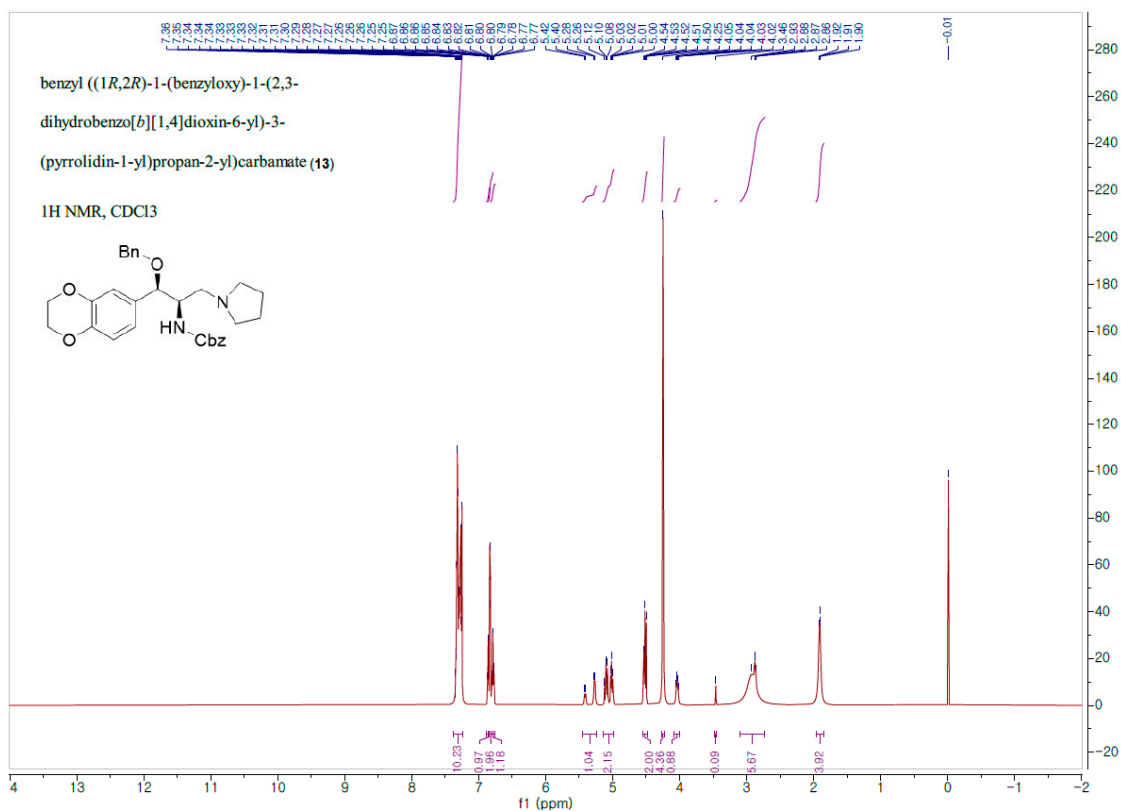Figure S15. H and <sup>13</sup>C NMR Spectra-S2-S11.



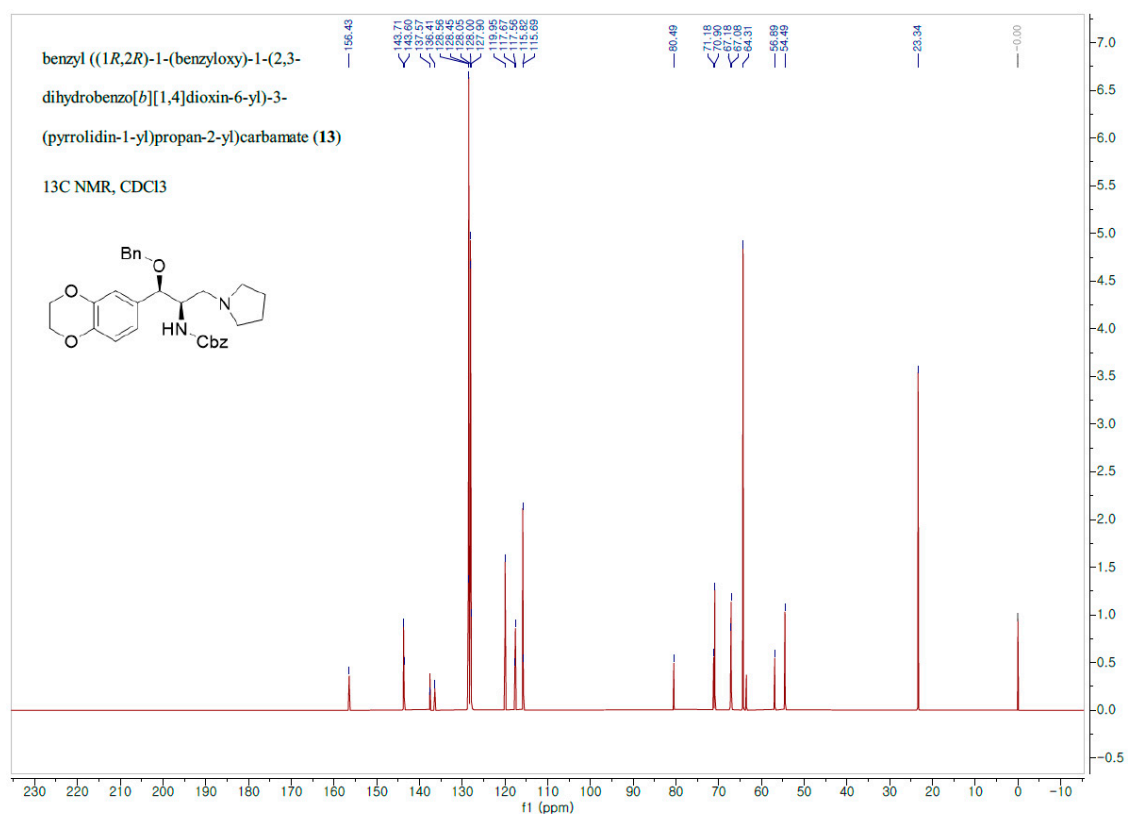Figure S16. H and <sup>13</sup>C NMR Spectra-S2-S11.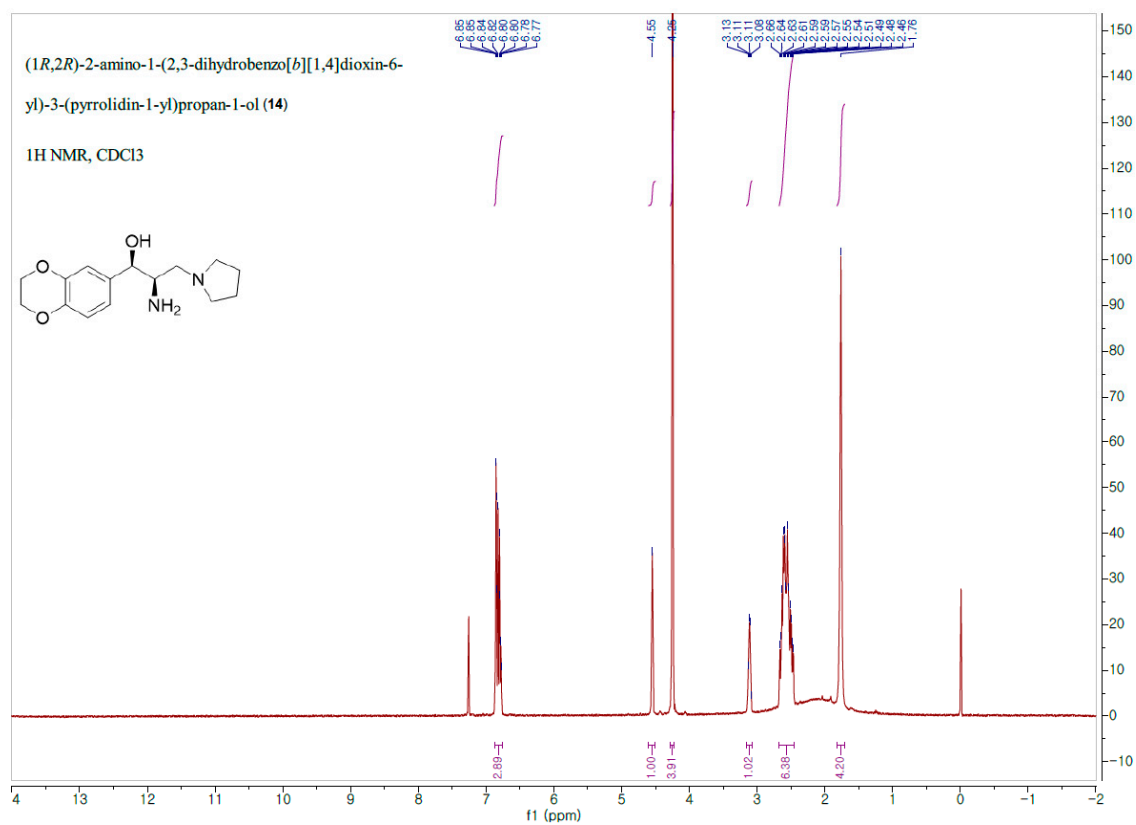Figure S17. H and <sup>13</sup>C NMR Spectra-S2-S11.

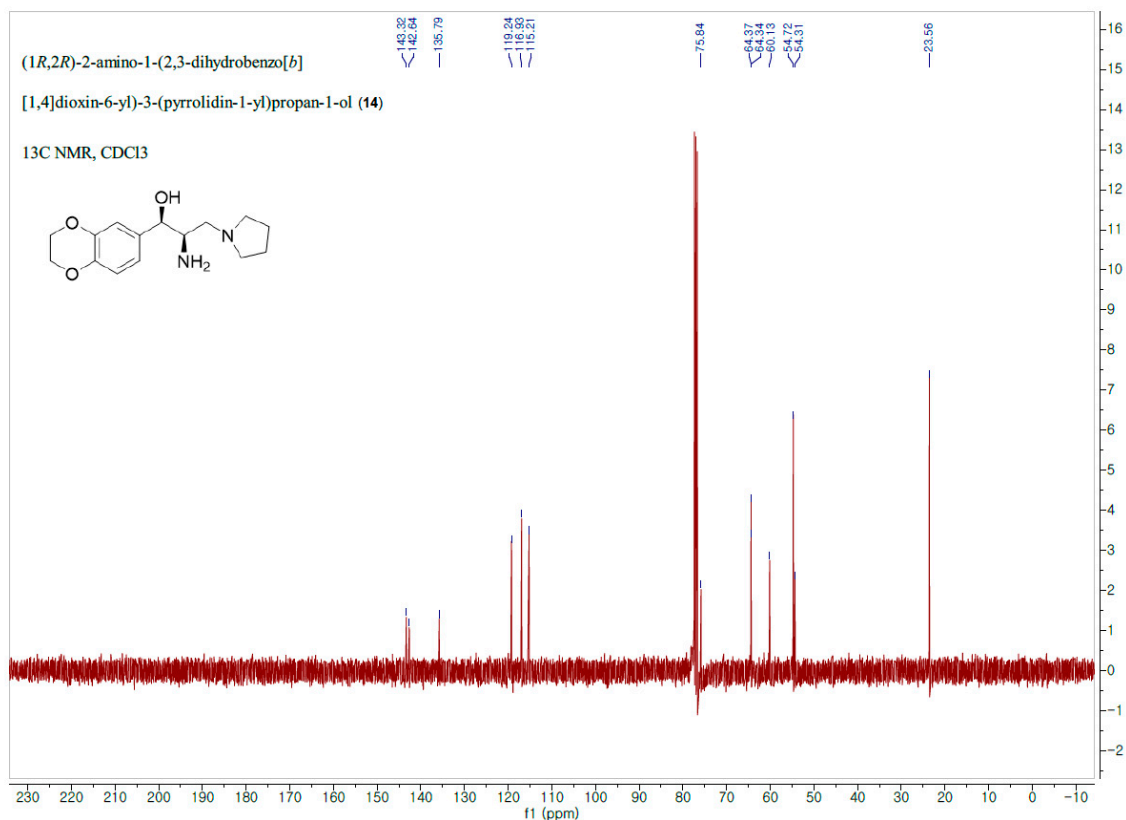

Figure S18. H and 13C NMR Spectra-S2-S11.

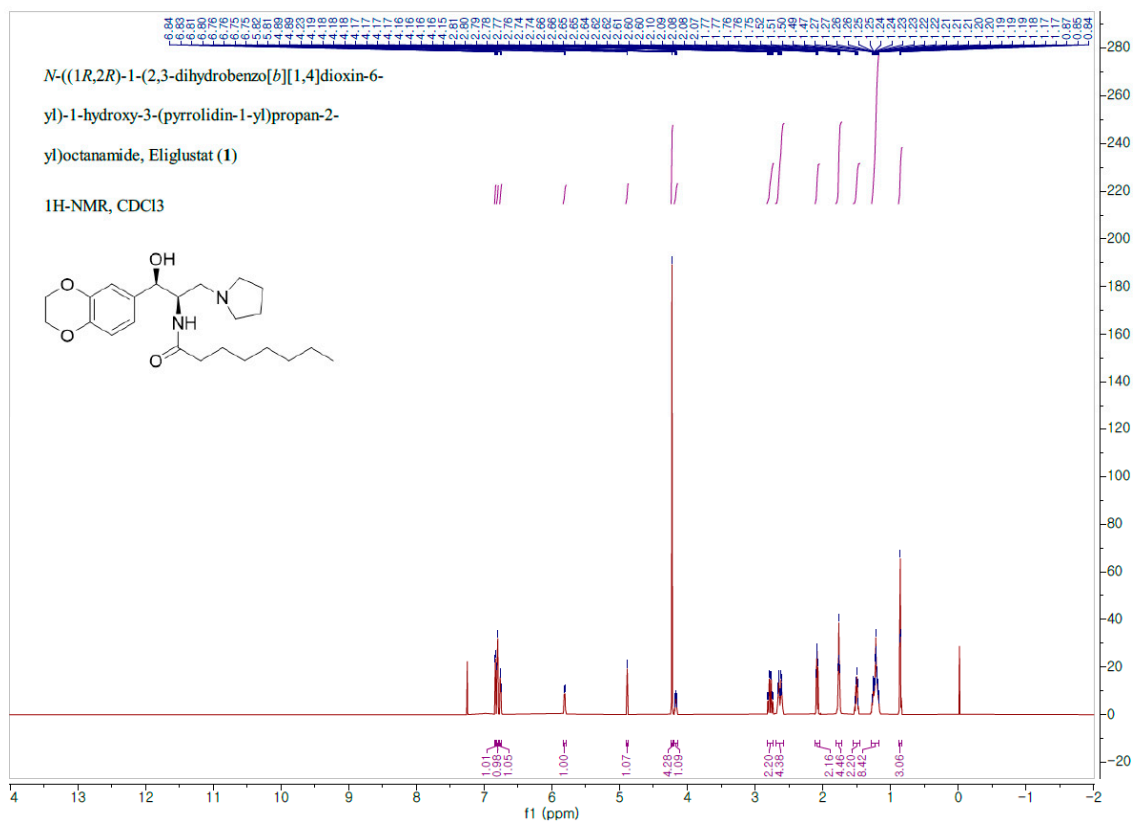

Figure S19. H and 13C NMR Spectra-S2-S11.

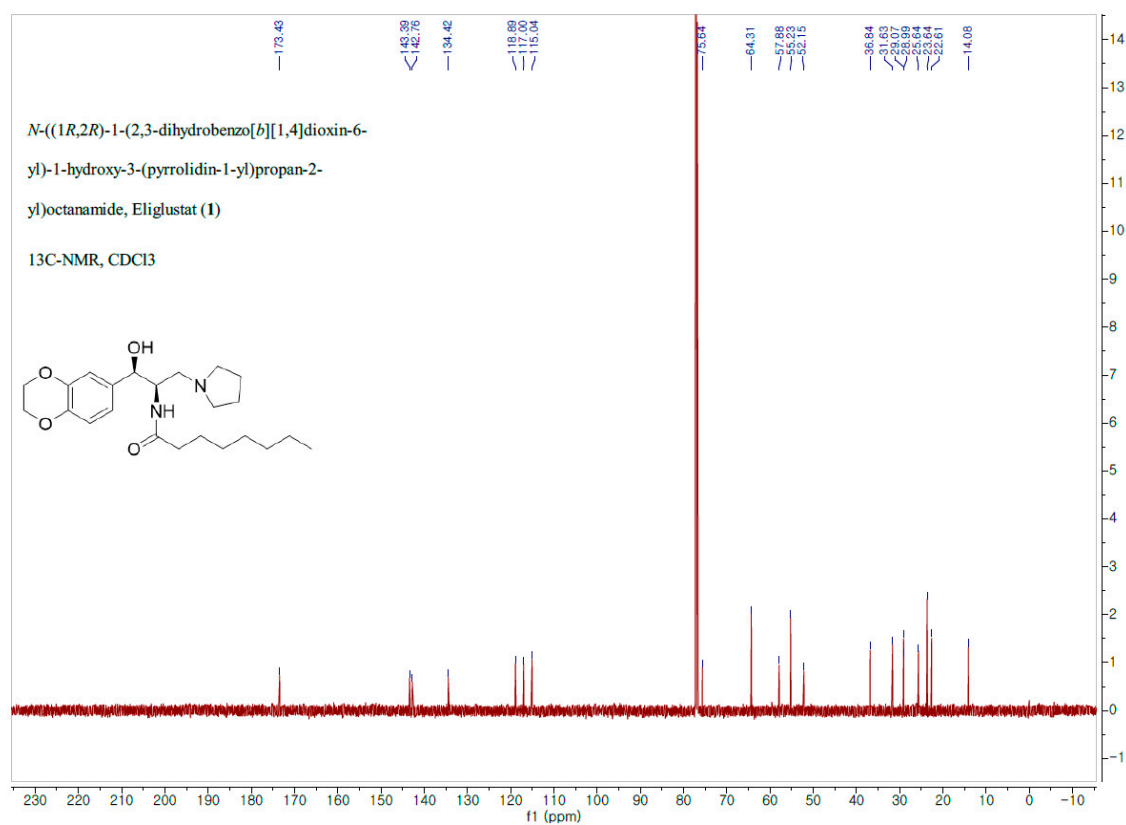Figure S20. H and <sup>13</sup>C NMR Spectra-S2-S11.
